# Supplementary material for: Epidemiological and geospatial profile of the prescription opioid crisis in Ohio, United States
Source: PubMed Central journal article supplement (PMC7063043; doi:10.1038/s41598-020-61281-y), 2020-03-09

## Supplementary materials for:

# Epidemiological and geospatial profile of the prescription opioid crisis in Ohio, United States

Andres Hernandez<sup>1,2</sup>, Adam J. Branscum<sup>3</sup>, Jingjing Li<sup>4</sup>, Neil MacKinnon<sup>5</sup>, Ana L. Hincapie<sup>5</sup>, Diego F. Cuadros<sup>1,2\*</sup>

<sup>1</sup>*Department of Geography and Geographic Information Science, University of Cincinnati, Cincinnati, USA*

<sup>2</sup>*Health Geography and Disease Modeling Laboratory, University of Cincinnati, Cincinnati, USA*

<sup>3</sup>*Department of Biostatistics, College of Public Health and Human Sciences, Oregon State University, Corvallis, USA*

<sup>4</sup>*Urban Health Collaborative, Dornsife School of Public Health, Drexel University, Philadelphia, Pennsylvania, USA*

<sup>5</sup>*James L. Winkle College of Pharmacy, University of Cincinnati, Cincinnati, Ohio, USA*

\*Reprints or correspondence: Diego F. Cuadros, PhD, E-mail: [diego.cuadros@uc.edu](mailto:diego.cuadros@uc.edu). Department of Geography and Geographic Information Science, University of Cincinnati, Cincinnati, OH, 45221. Telephone: (513) 556-3423. Fax: (513) 556-3370.

# SUPPLEMENTARY FIGURES

## Supplementary Figure 1. Opioid overdose mortality cases by county

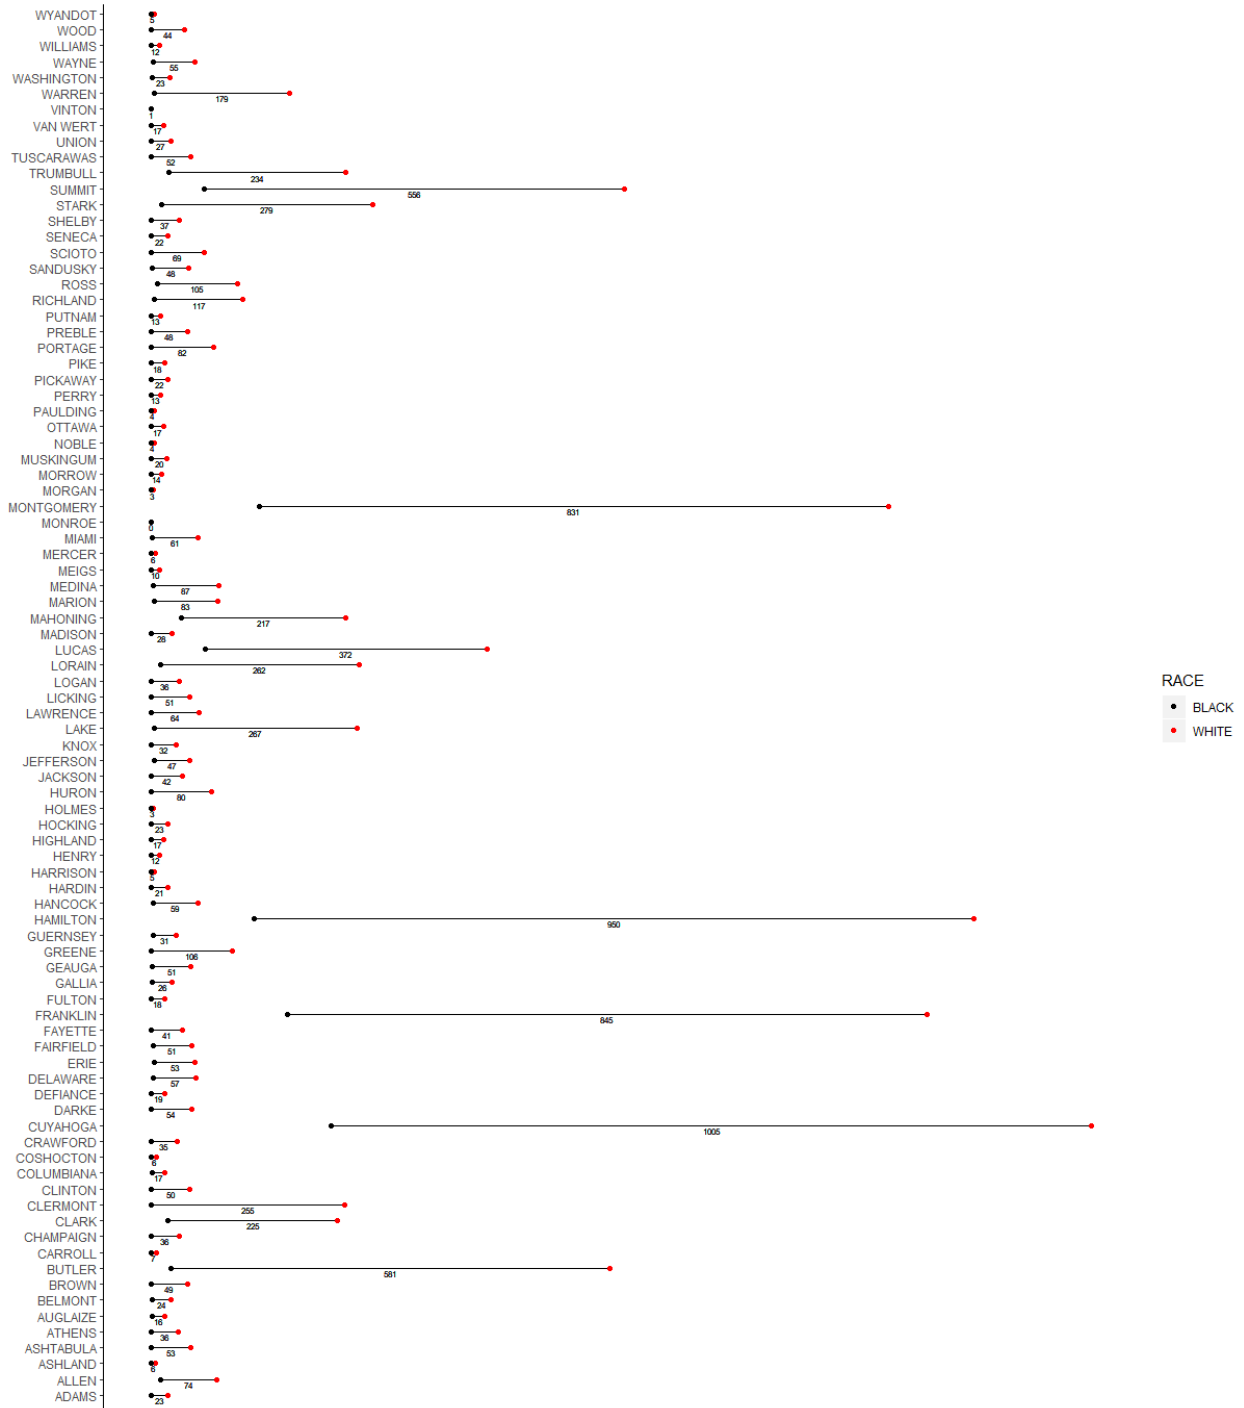

## SUPPLEMENTARY TABLES

**Supplementary Table 1.** Detailed results temporal trending causal effect estimation.

| PERIOD  | Actual Death Rates Growth Trends | Predicted Death Rates Growth Trends | Absolute Effects | Relative Effects | Actual Cumulative Death Rates Growth Trends | Predicted Cumulative Death Rates Growth Trends | Absolute Cumulative Effects | Sig. <sup>1</sup> |
|---------|----------------------------------|-------------------------------------|------------------|------------------|---------------------------------------------|------------------------------------------------|-----------------------------|-------------------|
| 2010-12 | -0.173                           | -0.150                              | -0.023           | 0.155            | -1.903                                      | -1.647                                         | -0.256                      | 0.320             |
| 2011-01 | -0.231                           | -0.165                              | -0.065           | 0.395            | -2.539                                      | -1.820                                         | -0.719                      | 0.076             |
| 2011-02 | -0.250                           | -0.125                              | -0.125           | 0.997            | -2.751                                      | -1.378                                         | -1.373                      | 0.004             |
| 2011-03 | -0.274                           | -0.105                              | -0.169           | 1.611            | -3.015                                      | -1.154                                         | -1.860                      | <b>0.001</b>      |
| 2011-04 | -0.268                           | -0.089                              | -0.179           | 2.019            | -2.949                                      | -0.977                                         | -1.972                      | <b>0.001</b>      |
| 2011-05 | -0.284                           | -0.065                              | -0.219           | 3.365            | -3.121                                      | -0.715                                         | -2.406                      | <b>0.001</b>      |
| 2011-06 | -0.297                           | -0.090                              | -0.207           | 2.302            | -3.271                                      | -0.991                                         | -2.280                      | <b>0.001</b>      |
| 2011-07 | -0.303                           | -0.086                              | -0.216           | 2.505            | -3.332                                      | -0.950                                         | -2.381                      | <b>0.001</b>      |
| 2011-08 | -0.325                           | -0.100                              | -0.225           | 2.253            | -3.571                                      | -1.098                                         | -2.473                      | <b>0.001</b>      |
| 2011-09 | -0.310                           | -0.089                              | -0.221           | 2.483            | -3.409                                      | -0.979                                         | -2.430                      | <b>0.001</b>      |
| 2011-10 | -0.293                           | -0.105                              | -0.188           | 1.795            | -3.225                                      | -1.154                                         | -2.071                      | <b>0.002</b>      |
| 2011-11 | -0.242                           | -0.206                              | -0.036           | 0.175            | -2.665                                      | -2.268                                         | -0.397                      | 0.363             |
| 2011-12 | -0.183                           | -0.325                              | 0.143            | -0.438           | -2.008                                      | -3.577                                         | 1.568                       | 0.192             |
| 2012-01 | -0.179                           | -0.357                              | 0.178            | -0.498           | -1.971                                      | -3.931                                         | 1.959                       | 0.181             |
| 2012-02 | -0.176                           | -0.347                              | 0.171            | -0.493           | -1.933                                      | -3.816                                         | 1.883                       | 0.202             |
| 2012-03 | -0.170                           | -0.288                              | 0.118            | -0.410           | -1.871                                      | -3.171                                         | 1.300                       | 0.280             |
| 2012-04 | -0.162                           | -0.274                              | 0.113            | -0.410           | -1.779                                      | -3.018                                         | 1.238                       | 0.300             |
| 2012-05 | -0.150                           | -0.315                              | 0.165            | -0.525           | -1.648                                      | -3.468                                         | 1.820                       | 0.192             |
| 2012-06 | -0.162                           | -0.179                              | 0.017            | -0.093           | -1.782                                      | -1.965                                         | 0.182                       | 0.467             |
| 2012-07 | -0.150                           | -0.177                              | 0.027            | -0.154           | -1.645                                      | -1.945                                         | 0.300                       | 0.448             |
| 2012-08 | -0.176                           | 0.040                               | -0.217           | -5.403           | -1.941                                      | 0.441                                          | -2.382                      | 0.123             |
| 2012-09 | -0.162                           | 0.004                               | -0.167           | -37.983          | -1.786                                      | 0.048                                          | -1.834                      | 0.175             |
| 2012-10 | -0.136                           | -0.008                              | -0.128           | 15.933           | -1.497                                      | -0.088                                         | -1.409                      | 0.230             |

|         |        |        |        |        |        |        |        |              |
|---------|--------|--------|--------|--------|--------|--------|--------|--------------|
| 2012-11 | -0.128 | -0.035 | -0.093 | 2.690  | -1.404 | -0.380 | -1.024 | 0.295        |
| 2012-12 | -0.123 | -0.119 | -0.004 | 0.035  | -1.352 | -1.306 | -0.045 | 0.492        |
| 2013-01 | -0.120 | -0.218 | 0.098  | -0.451 | -1.315 | -2.393 | 1.078  | 0.121        |
| 2013-02 | -0.134 | -0.129 | -0.005 | 0.040  | -1.475 | -1.418 | -0.057 | 0.469        |
| 2013-03 | -0.086 | -0.105 | 0.019  | -0.179 | -0.949 | -1.157 | 0.208  | 0.419        |
| 2013-04 | -0.006 | -0.103 | 0.097  | -0.939 | -0.069 | -1.135 | 1.066  | 0.166        |
| 2013-05 | 0.018  | -0.092 | 0.111  | -1.199 | 0.202  | -1.015 | 1.217  | 0.137        |
| 2013-06 | 0.032  | -0.137 | 0.169  | -1.235 | 0.355  | -1.507 | 1.861  | 0.039        |
| 2013-07 | 0.074  | -0.090 | 0.164  | -1.822 | 0.815  | -0.992 | 1.807  | 0.039        |
| 2013-08 | 0.121  | -0.158 | 0.279  | -1.768 | 1.332  | -1.733 | 3.065  | <b>0.005</b> |
| 2013-09 | 0.180  | -0.036 | 0.216  | -6.060 | 1.981  | -0.392 | 2.373  | 0.007        |
| 2013-10 | 0.222  | -0.080 | 0.302  | -3.782 | 2.440  | -0.877 | 3.317  | <b>0.001</b> |
| 2013-11 | 0.275  | -0.121 | 0.397  | -3.268 | 3.030  | -1.336 | 4.367  | <b>0.001</b> |
| 2013-12 | 0.327  | -0.133 | 0.459  | -3.466 | 3.595  | -1.458 | 5.053  | <b>0.001</b> |
| 2014-01 | 0.390  | -0.114 | 0.504  | -4.413 | 4.291  | -1.257 | 5.548  | <b>0.001</b> |
| 2014-02 | 0.415  | 0.235  | 0.180  | 0.767  | 4.569  | 2.585  | 1.984  | 0.088        |
| 2014-03 | 0.419  | 0.744  | -0.325 | -0.437 | 4.605  | 8.182  | -3.576 | 0.035        |
| 2014-04 | 0.479  | 0.796  | -0.317 | -0.399 | 5.267  | 8.759  | -3.492 | 0.045        |
| 2014-05 | 0.567  | 0.670  | -0.103 | -0.154 | 6.235  | 7.369  | -1.134 | 0.308        |
| 2014-06 | 0.609  | 0.787  | -0.177 | -0.226 | 6.700  | 8.652  | -1.952 | 0.196        |
| 2014-07 | 0.637  | 0.813  | -0.176 | -0.216 | 7.007  | 8.943  | -1.935 | 0.190        |
| 2014-08 | 0.654  | 0.988  | -0.335 | -0.339 | 7.191  | 10.872 | -3.682 | 0.048        |
| 2014-09 | 0.692  | 0.919  | -0.227 | -0.247 | 7.615  | 10.108 | -2.493 | 0.124        |
| 2014-10 | 0.714  | 0.986  | -0.272 | -0.275 | 7.857  | 10.845 | -2.988 | 0.077        |
| 2014-11 | 0.749  | 0.945  | -0.196 | -0.208 | 8.240  | 10.400 | -2.159 | 0.149        |
| 2014-12 | 0.785  | 0.972  | -0.187 | -0.193 | 8.633  | 10.692 | -2.059 | 0.164        |
| 2015-01 | 0.807  | 1.003  | -0.196 | -0.195 | 8.877  | 11.028 | -2.151 | 0.120        |
| 2015-02 | 0.848  | 0.934  | -0.086 | -0.092 | 9.330  | 10.278 | -0.948 | 0.267        |
| 2015-03 | 0.871  | 1.112  | -0.241 | -0.216 | 9.582  | 12.229 | -2.647 | 0.046        |

|         |       |       |        |        |        |        |        |              |
|---------|-------|-------|--------|--------|--------|--------|--------|--------------|
| 2015-04 | 0.903 | 1.419 | -0.517 | -0.364 | 9.931  | 15.613 | -5.682 | <b>0.001</b> |
| 2015-05 | 0.944 | 1.369 | -0.425 | -0.311 | 10.383 | 15.061 | -4.678 | <b>0.001</b> |
| 2015-06 | 0.993 | 1.126 | -0.133 | -0.118 | 10.920 | 12.385 | -1.466 | 0.131        |
| 2015-07 | 1.025 | 1.058 | -0.034 | -0.032 | 11.270 | 11.643 | -0.372 | 0.359        |
| 2015-08 | 1.076 | 0.992 | 0.083  | 0.084  | 11.831 | 10.915 | 0.916  | 0.172        |
| 2015-09 | 1.123 | 0.989 | 0.134  | 0.135  | 12.357 | 10.884 | 1.473  | 0.061        |
| 2015-10 | 1.180 | 0.949 | 0.231  | 0.243  | 12.979 | 10.443 | 2.537  | <b>0.001</b> |
| 2015-11 | 1.221 | 1.005 | 0.215  | 0.214  | 13.427 | 11.058 | 2.369  | 0.004        |
| 2015-12 | 1.258 | 1.000 | 0.258  | 0.258  | 13.840 | 11.004 | 2.836  | <b>0.002</b> |
| 2016-01 | 1.294 | 1.073 | 0.221  | 0.206  | 14.233 | 11.805 | 2.428  | <b>0.003</b> |
| 2016-02 | 1.359 | 1.125 | 0.233  | 0.207  | 14.946 | 12.380 | 2.566  | <b>0.002</b> |
| 2016-03 | 1.401 | 1.257 | 0.144  | 0.114  | 15.411 | 13.829 | 1.582  | 0.054        |
| 2016-04 | 1.431 | 1.359 | 0.072  | 0.053  | 15.743 | 14.951 | 0.792  | 0.212        |
| 2016-05 | 1.494 | 1.450 | 0.044  | 0.031  | 16.436 | 15.947 | 0.489  | 0.301        |
| 2016-06 | 1.556 | 1.462 | 0.094  | 0.064  | 17.121 | 16.085 | 1.036  | 0.131        |
| 2016-07 | 1.579 | 1.494 | 0.085  | 0.057  | 17.368 | 16.433 | 0.935  | 0.149        |
| 2016-08 | 1.601 | 1.520 | 0.080  | 0.053  | 17.609 | 16.724 | 0.885  | 0.163        |
| 2016-09 | 1.590 | 1.599 | -0.008 | -0.005 | 17.495 | 17.585 | -0.091 | 0.465        |
| 2016-10 | 1.603 | 1.626 | -0.023 | -0.014 | 17.636 | 17.888 | -0.251 | 0.403        |
| 2016-11 | 1.605 | 1.613 | -0.008 | -0.005 | 17.655 | 17.740 | -0.085 | 0.451        |
| 2016-12 | 1.601 | 1.671 | -0.070 | -0.042 | 17.611 | 18.381 | -0.770 | 0.175        |

1. Bold-face numbers indicate significance values (p-values < 0.005)

# Epidemiological and geospatial profile of the prescription opioid crisis in Ohio, United States

*Andres Hernandez, Adam J. Branscum, Jingjing Li, Neil MacKinnon, Ana L. Hincapie, Diego F. Cuadros\**

## Demographic analysis

```

library(ggplot2)
OpioidsCases <- read.csv("./Datasets/Compiled_located.csv")
zip_clipped <- c()
for (element in OpioidsCases$Zip_of_death) {
  zip_clipped[length(zip_clipped)+1] <- substr(element, 1, 5)
}
OpioidsCases$zip_death_c <- zip_clipped
zip_clipped <- c()
for (element in OpioidsCases$Zip_of_residence) {
  zip_clipped[length(zip_clipped)+1] <- substr(element, 1, 5)
}
OpioidsCases$zip_residence_c <- zip_clipped
OpioidFiltered <- subset(OpioidsCases, Prescription_opiates == "Yes",
  # OpioidFiltered <- subset(OpioidsCases, Opiates_all == "Yes",
  select = c(
    "Year_of_death",
    "Month_of_death",
    "Day_of_death",
    "Age_In_Years",
    "Race",
    "Sex",
    "Occupation",
    "Marital_status",
    "zip_death_c",
    "zip_residence_c",
    "Multiple_cause_of_death",
    "Cause_of_death1",
    "Cause_of_death2",
    "Cause_of_death3",
    "Cause_of_death4",
    "How_injured",
    "Other_condition",
    "Alcohol_all_types",
    "Heroin",
    "Benzodiazepines",
    "Methadone",
    "Cocaine",
    "Hallucinogens",
    "Barbituates",
    "Alcohol_Ethanol",
    "Methanol",
    "Alcohol_unspecified",
    "Fentanyl_and_Analogues",
    "Carfentanil"
  ))

TEMPFILTER <- rbind (
  OpioidFiltered[OpioidFiltered$Race=="WHITE",],
  OpioidFiltered[OpioidFiltered$Race=="BLACK",]
)

OpioidFiltered <- TEMPFILTER
OpioidFiltered$Year_Month <- OpioidFiltered$Year_of_death*100+OpioidFiltered$Month_of_death

```

```

OpioidAgeAdj <- OpioidFiltered[OpioidFiltered$Age_In_Years > 19 & OpioidFiltered$Age_In_Years <
65, ]

OpioidDeathsZipCodeYear <- as.data.frame.matrix(table(OpioidAgeAdj$zip_residence_c, OpioidAgeAdj
$Year_Month))
OpioidDeathsZipCodeYear$Total <- rowSums(OpioidDeathsZipCodeYear)
OpioidDeathsZipCodeYear$ZipCodes <- rownames(OpioidDeathsZipCodeYear)

# Population File Management
Population_2010 <- read.csv("./Datasets/POP_ZIP_AGG_OH_2010.csv", sep = ",")
Population_20112017 <- read.csv("./Datasets/PopZipCode2011-2017.csv", sep = ",")

pop.whitemales2064_2010 <- apply(Population_2010[,11:22], 1, sum)
pop.whitefemales2064_2010 <- apply(Population_2010[,35:46], 1, sum)
pop.blackmales2064_2010 <- apply(Population_2010[,59:70], 1, sum)
pop.blackfemales2064_2010 <- apply(Population_2010[,83:94], 1, sum)

pop.whitemales2064_20117 <- apply(Population_20112017[,12:17], 1, sum)
pop.whitefemales2064_20117 <- apply(Population_20112017[,27:32], 1, sum)
pop.blackmales2064_20117 <- apply(Population_20112017[,43:48], 1, sum)
pop.blackfemales2064_20117 <- apply(Population_20112017[,58:63], 1, sum)

adjusted.pop_2010 <- apply(cbind(
  pop.whitemales2064_2010,
  pop.whitefemales2064_2010,
  pop.blackmales2064_2010,
  pop.blackfemales2064_2010
), 1, sum)

adjusted.pop.zipcode_2010 <- data.frame(cbind(Population_2010[,1], 2010, adjusted.pop_2010))
names(adjusted.pop.zipcode_2010) <- c("zipcode", "year", "pop")

adjusted.pop_20117 <- apply(cbind(
  pop.whitemales2064_20117,
  pop.whitefemales2064_20117,
  pop.blackmales2064_20117,
  pop.blackfemales2064_20117
), 1, sum)

adjusted.pop.zipcode_20117 <- cbind(Population_20112017[,1], Population_20112017[67], adjusted.p
op_20117)
names(adjusted.pop.zipcode_20117) <- c("zipcode", "year", "pop")

adjusted.pop.zipcode <- rbind(
  adjusted.pop.zipcode_2010,
  adjusted.pop.zipcode_20117
)

# Adjust by age Population
TempPop_2010 <- as.data.frame(subset(adjusted.pop.zipcode, year ==2010, c("zipcode", "pop")))
TempPop_2011 <- as.data.frame(subset(adjusted.pop.zipcode, year ==2011, c("pop")))
TempPop_2012 <- as.data.frame(subset(adjusted.pop.zipcode, year ==2012, c("pop")))
TempPop_2013 <- as.data.frame(subset(adjusted.pop.zipcode, year ==2013, c("pop")))
TempPop_2014 <- as.data.frame(subset(adjusted.pop.zipcode, year ==2014, c("pop"))[-1,])

```



```

TempPop_2015 <- as.data.frame(subset(adjusted.pop.zipcode, year ==2015, c("pop"))[-1,])
TempPop_2016 <- as.data.frame(subset(adjusted.pop.zipcode, year ==2016, c("pop"))[-1,])
TempPop_2017 <- as.data.frame(subset(adjusted.pop.zipcode, year ==2017, c("pop")))

TempPop <- cbind(TempPop_2010, TempPop_2011, TempPop_2012, TempPop_2013, TempPop_2014, TempPop_2015, TempPop_2016, TempPop_2017)
names(TempPop) <- c("ZipCode", "A2010", "A2011", "A2012", "A2013", "A2014", "A2015", "A2016", "A2017")

linearmodel <- function(x){
  df <- data.frame(Years = seq(0, 84, 12))
  df$Pop <- x[2:9]
  df$Pop[which(df$Pop==0)] <- 1
  model1 <- lm(log(Pop) ~ Years, data = df)
  predicted <- exp(predict(model1, newdata = data.frame(Years = c(0:95))))
  return(predicted)
}

splineModel <- function(x) {
  model1 <- smooth.spline(seq(0, 84, 12), x[2:9])
  return(predict(model1, 1:96)$y)
}

predictedPopDf <- data.frame(t(apply(TempPop, 1, splineModel)))
predictedPopDf$ZipCodes <- TempPop$ZipCode

TempOhioZipCodeYear <- OpioidDeathsZipCodeYear
TempOhioZipCodeYear2 <- matrix(0,1,98)

for(i in as.numeric(predictedPopDf$ZipCodes)){
  if(!substring(as.character(i),1,1) == "*") {
    if(!i %in% TempOhioZipCodeYear$ZipCode){
      # print(i)
      temp <- cbind(matrix(0,1,97), i)
      # print(temp)
      # print("+++++")
      TempOhioZipCodeYear2 <- rbind(TempOhioZipCodeYear2, temp)
    } else {
      temp <- matrix(as.numeric(TempOhioZipCodeYear[TempOhioZipCodeYear$ZipCodes==i, ]), 1, 98)
      # print(temp)
      # print("*****")
      TempOhioZipCodeYear2 <- rbind(TempOhioZipCodeYear2, temp)
    }
  }
}

TempOhioZipCodeYear2 <- as.data.frame(TempOhioZipCodeYear2)
TempOhioZipCodeYear2 <- TempOhioZipCodeYear2[-1,]

names(TempOhioZipCodeYear2) <- names(OpioidDeathsZipCodeYear)
rownames(TempOhioZipCodeYear2) <- TempOhioZipCodeYear2$ZipCodes

PopDeaths <- merge(OpioidDeathsZipCodeYear[,-97], predictedPopDf, by = "ZipCodes")
aggOpioidsDeath <- data.frame(ZipCodes=PopDeaths$ZipCodes)

```

```

aggOpioidsPop <- data.frame(ZipCodes=PopDeaths$ZipCodes)

OpioidsDeathsZipCode <- data.frame(zipcodes = aggOpioidsDeath$ZipCodes)
OpioidsDeathsZipCode$Deaths <- rowSums(aggOpioidsDeath[,-1])

Ind_cases <- OpioidAgeAdj[1,]
Ind_cases <- Ind_cases[c(-1),]

k <- 1
for(i in OpioidAgeAdj$zip_residence_c){
  # print(i)
  if(i %in% OpioidsDeathsZipCode$zipcodes) {
    # print("match")
    # print(i)
    # print(OpioidAgeAdj[k,])
    Ind_cases <- rbind(Ind_cases, OpioidAgeAdj[k,])
  }
  k <- k+1
}

Ind_cases_Filter <- Ind_cases[Ind_cases$Race=="BLACK",]
brakes <- c(20,25,30,35,40,45,50,55,60,65)
DemographicPyramid <- data.frame(agegroup = cut(Ind_cases_Filter$Age_In_Years,brakes,incl
ude.lowest=TRUE, right = FALSE))
DemographicPyramid$sex <- Ind_cases_Filter$Sex
DemographicPyramid$year <- Ind_cases_Filter$Year_of_death

demplotdata <- data.frame( table(DemographicPyramid$agegroup, DemographicPyramid$sex)[,1] )
demplotdata$gender <- "F"
demplotdata2 <- data.frame( table(DemographicPyramid$agegroup, DemographicPyramid$sex)[,2] ) * -
1
demplotdata2$gender <- "M"
demplotdataTotal <- rbind(demplotdata, demplotdata2)
names(demplotdataTotal) <- c("CASES", "GENDER")
demplotdataTotal$AGE_GROUP <-
  c("20-24", "25-29", "30-34", "35-39", "40-44", "45-49", "50-54", "55-59", "60-64",
    "20-24", "25-29", "30-34", "35-39", "40-44", "45-49", "50-54", "55-59", "60-64")



```

```

geom_bar(data = labelsF, stat = "identity") +
geom_bar(data = labelsM, stat = "identity") +
xlab("") +
ylab("") +
scale_y_continuous(
  limits = c(-1*true_limit, true_limit),
  breaks = seq(-150, 150, 50),
  labels = c("150", "100", "50", "0", "50", "100", "150")
) +
scale_fill_manual(values=alpha(c("#ff00e1", "#2500ff"),0.5)) +
geom_bar(data = labelsF, colour="black", stat = "identity", size=1) +
geom_bar(data = labelsM, colour="black", stat = "identity", size=1) +
geom_text(data=labelsF, aes(x = AGE_GROUP, y = CASES*1.1+10, label = CASES), size = 5, position
  = "identity", col=I("#ff00e1")) +
geom_text(data=labelsM, aes(x = AGE_GROUP, y = CASES*1.1-15, label = -1 * CASES), size = 5, position
  = position_stack(vjust = 0.1), col=I("#2500ff")) +

theme_minimal() +
theme(axis.text = element_text(size = 15, colour="black")) +
coord_flip()
pyramidGH2

```

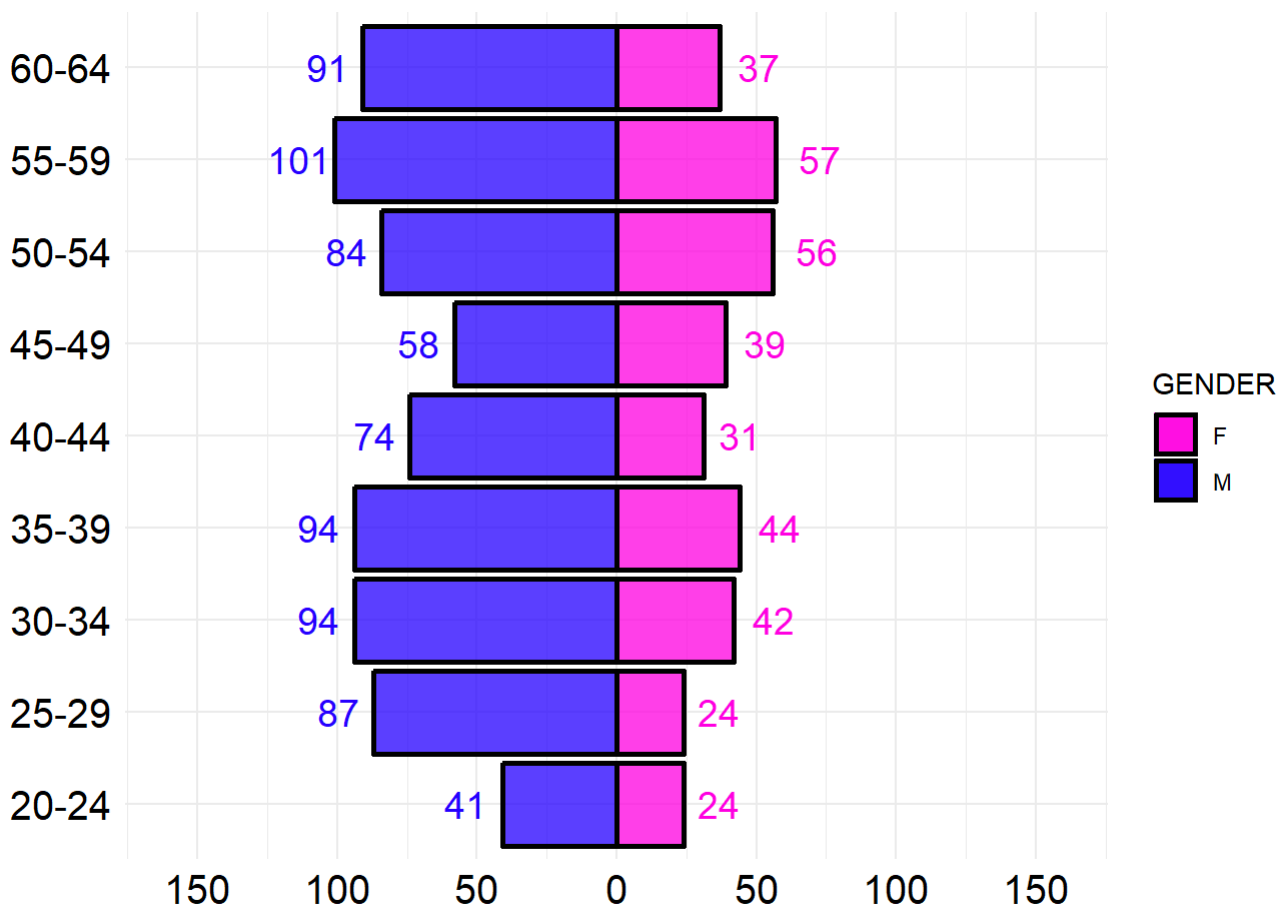

```

Ind_cases_Filter <- Ind_cases[Ind_cases$Race=="WHITE",]
brakes <- c(20,25,30,35,40,45,50,55,60,65)
DemographicPyramid <- data.frame(agegroup = cut(Ind_cases_Filter$Age_In_Years,brakes,incl
ude.lowest=TRUE, right = FALSE))
DemographicPyramid$sex <- Ind_cases_Filter$Sex
DemographicPyramid$year <- Ind_cases_Filter$Year_of_death

demplotdata <- data.frame( table(DemographicPyramid$agegroup, DemographicPyramid$sex)[,1] )
demplotdata$gender <- "F"
demplotdata2 <- data.frame( table(DemographicPyramid$agegroup, DemographicPyramid$sex)[,2] ) * -
1
demplotdata2$gender <- "M"
demplotdataTotal <- rbind(demplotdata, demplotdata2)
names(demplotdataTotal) <- c("CASES", "GENDER")
demplotdataTotal$AGE_GROUP <-
  c("20-24", "25-29", "30-34", "35-39", "40-44", "45-49", "50-54", "55-59", "60-64",
    "20-24", "25-29", "30-34", "35-39", "40-44", "45-49", "50-54", "55-59", "60-64")



```

```

= "identity", col=I("#ff00e1")) +
geom_text(data=labelsM, aes(x = AGE_GROUP, y = CASES*1.1-150, label = -1 * CASES), size = 5, position = position_stack(vjust = 0.1), col=I("#2500ff")) +
# geom_text(data=labelsF, aes(x = AGE_GROUP, y = CASES*1.1+10, label = CASES), size = 5, position = "identity", col=I("#ff00e1")) +
# geom_text(data=labelsM, aes(x = AGE_GROUP, y = CASES*1.1-15, label = -1 * CASES), size = 5, position = position_stack(vjust = 0.1), col=I("#2500ff")) +
theme_minimal() +
theme(axis.text = element_text(size = 15, colour="black")) +
# geom_text(data=labelsF, aes(x = AGE_GROUP, y = CASES*1.1+450, label = paste('(',RATES,')', sep = "")), size = 3, position = "identity", col=I("#ff00e1")) +
# geom_text(data=labelsM, aes(x = AGE_GROUP, y = CASES*1.1-250, label = paste('(',RATES,')', sep = "")), size = 3, position = position_stack(vjust = 0.1), col=I("#2500ff")) +
coord_flip()
pyramidGH3

```

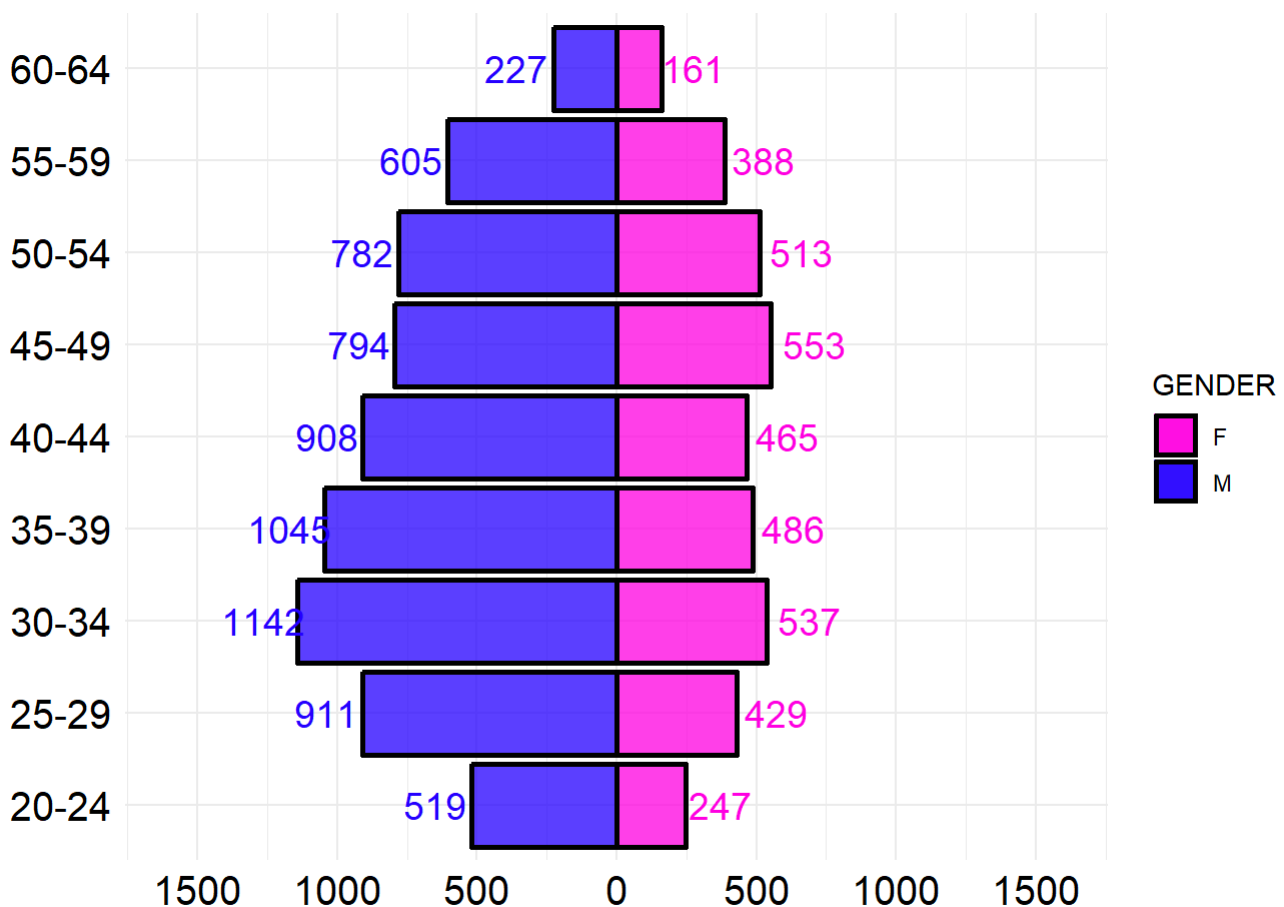

## Space and space-time relative risk estimation

### Relative Risk Spatial Analysis

```

library(sf)
library(spdep)
library(INLA)
library(SpatialEpi)
library(rgdal)
library(leaflet)

load("./Datasets/AggCases.RData")

# Create expected cases Matrix
CasesZipTime <- CasesZipTime_All
PopZipTime <- PopZipTime_All
casecounts <- data.frame(Cases = apply(CasesZipTime[,-1], 1, sum))
casecounts$ZipCode <- CasesZipTime$ZipCodes
E <- expected(population = PopZipTime[,33], cases = casecounts$Cases, n.strata = 1)

# Read shapefile
# ShapeFile <- readOGR("/home/andres/Desktop/OpioidsManuscript/Hernandez_EpidemiologicGeospatial
OpioidsOhio_Code/Datasets/OhioZipShape", "OhioZipCodesWSG1984")
ShapeFile <- readOGR("C:\\Users\\Andres\\Desktop\\OpioidsManuscript\\Hernandez_EpidemiologicGeos
patialOpioidsOhio_Code\\Datasets\\OhioZipShape", "OhioZipCodesWSG1984")
FilteredShapeFile <- ShapeFile[ShapeFile$ZCTA5CE10 %in% CasesZipTime$ZipCodes,]
RenamedFilteredShapeFile <- spChFIDs(FilteredShapeFile, as.character(FilteredShapeFile$ZCTA5CE1
0))

# Create neighbors matrix
matrixEpi <- data.frame(ZipCode = casecounts$ZipCode, Cases = casecounts$Cases, E = E, SMR = rou
nd(casecounts$Cases/E,3))

rownames(matrixEpi) <- matrixEpi$ZipCode
map <- SpatialPolygonsDataFrame(RenamedFilteredShapeFile, matrixEpi, match.ID = TRUE)

nb <- poly2nb(map) # create neighbors
nb2INLA("./Datasets/neighzip.adj", nb)
adj.matrix <- inla.read.graph(filename = "./Datasets/neighzip.adj")

# visualize Map
# Create INLA models
map$re_u <- 1:nrow(map@data)
map$re_v <- 1:nrow(map@data)

# Spatial
formula <- Cases ~ 1 +
  f( re_u,
    model = "bym",
    graph = adj.matrix,
    scale.model = TRUE,
    adjust.for.con.comp = TRUE ,
    hyper = list (
      prec.unstruct =
        list (
          prior = "loggamma",
          param = c (1 , 0.001)
        )
    )
  )

```

```

    ),
    prec.spatial =
      list (
        prior = "loggamma",
        param = c (1 , 0.001)
      )
  )
) +
f(
  re_v,
  model = "iid"
)

res <- inla(
  formula,
  # family = "poisson",
  family = "zeroinflatedpoisson1",
  data = map@data,
  E = E,
  control.predictor = list(compute = TRUE)
)

map$RR <- res$summary.fitted.values[, "mean"]
map$LL <- res$summary.fitted.values[, "0.025quant"]
map$UL <- res$summary.fitted.values[, "0.975quant"]

map$RR[map$RR > 100] <- 100
map$RR[map$RR < -100] <- -100

map$LL[map$LL > 100] <- 100
map$LL[map$LL < -100] <- -100

map$UL[map$UL > 100] <- 100
map$UL[map$UL < -100] <- -100

# Mapping relative risk
mapPlot <- map

library(BAMMtools)
binsrates <- getJenksBreaks(mapPlot$RR, 6, subset = NULL)
bins <- c(0, binsrates, Inf)
pal <- colorBin("YlOrRd", domain = mapPlot$RR, bins = bins)

l <- leaflet(mapPlot) %>% addTiles()
l %>% addPolygons(color = "grey", weight = 1, fillColor = ~pal(RR), fillOpacity = 0.5) %>%
  addLegend(pal = pal, values = ~RR, opacity = 0.5, title = "Aggregated RR 2010-2017", position
    = "bottomright")

# writeOGR(obj=map, dsn="C:\\Users\\Andres\\Documents\\Andres\\ Documents\\Summer2019\\Opioids",
  layer="opioids_spatial_w", driver="ESRI Shapefile")

```

```
## OGR data source with driver: ESRI Shapefile
## Source: "C:\Users\Andres\Desktop\OpioidsManuscript\Hernandez_EpidemiologicGeospatialOpioidsOhio_Code\Datasets\OhioZipShape", layer: "OhioZipCodesWSG1984"
## with 1198 features
## It has 18 fields
## Integer64 fields read as strings:  OBJECTID OBJECTID_1
```

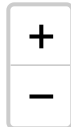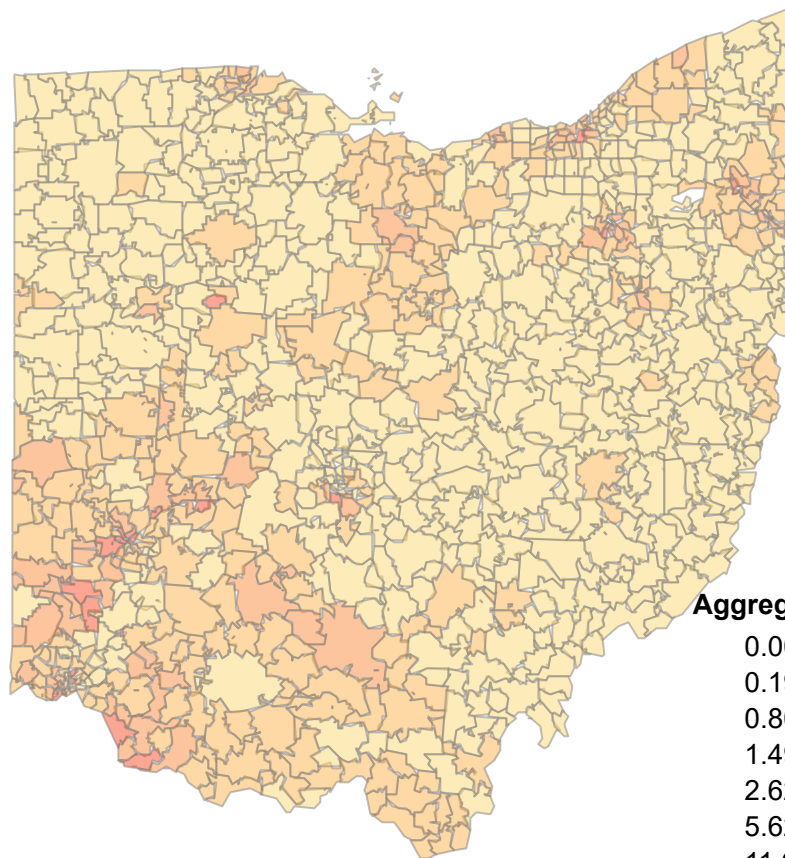**Aggregated RR 2010-2017**

0.000 – 0.199  
0.199 – 0.806  
0.806 – 1.490  
1.490 – 2.626  
2.626 – 5.628  
5.628 – 11.605  
11.605 – Inf

Prints use map data from Leaflet and OpenStreetMap and their data sources. To learn more, visit <https://leafletjs.com/> and <http://www.openstreetmap.org/copyright>. Data extracted from OpenStreetMap after September 2012 is licensed on terms of the Open Database License, "ODbL" 1.0, previously it was licensed CC-BY-SA 2.0.

## Relative Risk Spatio-temporal Analysis



```

# Spatio-temporal
order <- match (map$ZipCode, CasesZipTime_W$ZipCodes)
SpatioTemporalObjectCases.ord <- CasesZipTime_W[order, ]

order <- match (map$ZipCode, PopZipTime_W$ZipCodes)
SpatioTemporalObjectPop.ord <- PopZipTime_W[order, ]

SpatioTemporalObjectCases <- SpatioTemporalObjectCases.ord
SpatioTemporalObjectPop <- SpatioTemporalObjectPop.ord
TempSpatiotemporal <- matrix(0,1,6)

for(element in 1:length(colnames(SpatioTemporalObjectCases[,-1]))){
  temp <-
    as.data.frame(
      cbind(
        SpatioTemporalObjectCases[,1],
        1:length(SpatioTemporalObjectPop[,1]),
        rep(element, length(SpatioTemporalObjectPop[,1])),
        SpatioTemporalObjectCases[,element+1],
        SpatioTemporalObjectPop[,element+1],
        expected(population = SpatioTemporalObjectPop[,element+1], cases = SpatioTemporalObjectC
ases[,element+1], n.strata = 1)
      )
    )
  TempSpatiotemporal <- rbind(TempSpatiotemporal, temp)
}

TempSpatiotemporal <- as.data.frame(TempSpatiotemporal)
TempSpatiotemporal <- TempSpatiotemporal[-1,]
names(TempSpatiotemporal) <- c("zipcodes", "zipid", "year", "Y", "n", "E")
TempSpatiotemporal$zipid1 <- TempSpatiotemporal$zipid

adj.matrix <- inla.read.graph(filename = "./Datasets/neighzip.adj")
formula.par <- Y ~ f(zipid,model="bym",graph=adj.matrix, constr=TRUE) + f(zipid1,year,model="iid", constr=TRUE) + year

model.par <- inla(formula.par,family="poisson",data=TempSpatiotemporal,E=E,
  control.predictor=list(compute=TRUE),
  control.compute=list(dic=TRUE,cpo=TRUE),
  num.threads = 20 )

m <- model.par$marginals.random[[1]][1:1197]
zeta.ST1 <- unlist(lapply(m,function(x)inla.emarginal(exp,x)))

SMR.cutoff<- c(0.0, 0.9, 1.0, 1.1,3)
xi.factor <- cut(zeta.ST1,breaks=SMR.cutoff,include.lowest=TRUE)
m <- model.par$summary.random[[2]][1:1197,2]
int.cut <- c(-0.008,-0.001,0,0.001,0.006)
int.factor <- cut(m,breaks=int.cut,include.lowest=TRUE)

TempFittedResults <- data.frame(
  ZipCode = TempSpatiotemporal$zipcodes[1:1197],
  FittedValues = model.par$summary.fitted.values[, "mean"][1:1197]
)

```

```

)

rownames(TempFittedResults) <- TempFittedResults$ZipCode
map <- SpatialPolygonsDataFrame(RenamedFilteredShapeFile, TempFittedResults, match.ID = TRUE)

map$Spatial <- xi.factor
map$Temporal <- int.factor
map$RR <- model.par$summary.fitted.values[, "mean"][1:1197]

firstSem <- rowMeans(
  cbind(
    model.par$summary.fitted.values[, "mean"][(1197*0+1):(1197*1)],
    model.par$summary.fitted.values[, "mean"][(1197*1+1):(1197*2)],
    model.par$summary.fitted.values[, "mean"][(1197*2+1):(1197*3)],
    model.par$summary.fitted.values[, "mean"][(1197*3+1):(1197*4)],
    model.par$summary.fitted.values[, "mean"][(1197*4+1):(1197*5)],
    model.par$summary.fitted.values[, "mean"][(1197*5+1):(1197*6)]
  )
)

lastSem <- rowMeans(
  cbind(
    model.par$summary.fitted.values[, "mean"][(1197*26+1):(1197*27)],
    model.par$summary.fitted.values[, "mean"][(1197*27+1):(1197*28)],
    model.par$summary.fitted.values[, "mean"][(1197*28+1):(1197*29)],
    model.par$summary.fitted.values[, "mean"][(1197*29+1):(1197*30)],
    model.par$summary.fitted.values[, "mean"][(1197*30+1):(1197*31)],
    model.par$summary.fitted.values[, "mean"][(1197*31+1):(1197*32)]
  )
)

map$RR2 <- (lastSem - firstSem)*100
map$RR3 <- (lastSem)

map$ZipCode[which(map$RR2>300, TRUE)]
map$Z <- map$RR2
map$Z[map$Z > 300] <- 300
map$Z[map$Z < -300] <- -300

risk2017 <- data.frame(zipcodes = map$ZipCode, risk2017 = lastSem)
mapPlot <- map

binsdrates <- getJenksBreaks(mapPlot$Z, 5, subset = NULL)
bins <- c(0, binsdrates, Inf)
pal <- colorBin("YlOrRd", domain = mapPlot$Z, bins = bins)

l <- leaflet(mapPlot) %>% addTiles()
l %>% addPolygons(color = "grey", weight = 1, fillColor = ~pal(Z), fillOpacity = 0.5) %>% addLegend(
  pal = pal, values = ~Z, opacity = 0.5, title = "Spatio-temporal RR change (2010-2017)", position = "bottomright")

# writeOGR(obj=map, dsn="C:\\Users\\Andres\\Documents\\Andres Documents\\Summer2019\\Opioids",
  layer="spatiotemporal_06112019_2", driver="ESRI Shapefile")

```

## [1] 45417 45403 44104

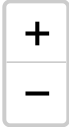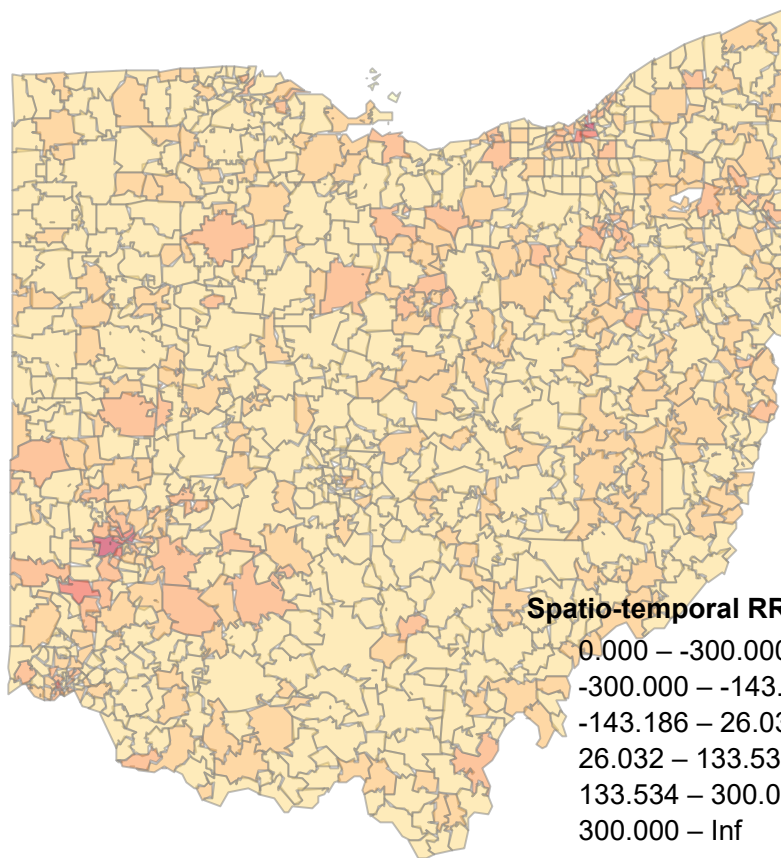

Prints use map data from Leaflet and OpenStreetMap and their data sources. To learn more, visit <https://leafletjs.com/> and <http://www.openstreetmap.org/copyright>. Data extracted from OpenStreetMap after September 2012 is licensed on terms of the Open Database License, "ODbL" 1.0, previously it was licensed CC-BY-SA 2.0.

## Temporal trend analysis

```
library(ggmap)
library(CausalImpact)

OpioidsCases <- read.csv("./Datasets/Compiled_located.csv") # Data availability upon request and
with authorization of the Ohio Department of Public Health

zip_clipped <- c()

for (element in OpioidsCases$Zip_of_death) {
  zip_clipped[length(zip_clipped)+1] <- substr(element, 1, 5)
}
OpioidsCases$zip_death_c <- zip_clipped

zip_clipped <- c()
for (element in OpioidsCases$Zip_of_residence) {
  zip_clipped[length(zip_clipped)+1] <- substr(element, 1, 5)
}
OpioidsCases$zip_residence_c <- zip_clipped

#Filter by prescription opioids
OpioidFiltered <- subset(OpioidsCases, Prescription_opiates == "Yes",
  select = c(
    "Year_of_death",
    "Month_of_death",
    "Day_of_death",
    "Age_In_Years",
    "Race",
    "Sex",
    "Occupation",
    "Marital_status",
    "zip_death_c",
    "zip_residence_c",
    "Multiple_cause_of_death",
    "Cause_of_death1",
    "Cause_of_death2",
    "Cause_of_death3",
    "Cause_of_death4",
    "How_injured",
    "Other_condition",
    "Alcohol_all_types",
    "Heroin",
    "Benzodiazepines",
    "Methadone",
    "Cocaine",
    "Hallucinogens",
    "Barbituates",
    "Alcohol_Ethanol",
    "Methanol",
    "Alcohol_unspecified",
    "Fentanyl_and_Analogues",
    "Carfentanil"
  ))
```

```

TEMPFILTER <- rbind (
  OpioidFiltered[OpioidFiltered$Race=="WHITE",],
  OpioidFiltered[OpioidFiltered$Race=="BLACK",]
)

OpioidFiltered <- TEMPFILTER
OpioidFiltered$Year_Month <- OpioidFiltered$Year_of_death*100+OpioidFiltered$Month_of_death
OpioidAgeAdj <- OpioidFiltered[OpioidFiltered$Age_In_Years > 19 & OpioidFiltered$Age_In_Years <
65, ]

brakes <- c(20,25,30,35,40,45,50,55,60,65)
DemographicPyramid <- data.frame(agegroup = cut(OpioidAgeAdj$Age_In_Years,brakes=brakes,include.
lowest=TRUE, right = FALSE))
DemographicPyramid$sex <- OpioidAgeAdj$Sex
DemographicPyramid$year <- OpioidAgeAdj$Year_of_death

OpioidDeathsZipCodeYear <- as.data.frame.matrix(table(OpioidAgeAdj$zip_residence_c, OpioidAgeAdj
$Year_Month))
OpioidDeathsZipCodeYear$Total <- rowSums(OpioidDeathsZipCodeYear)
OpioidDeathsZipCodeYear$ZipCodes <- rownames(OpioidDeathsZipCodeYear)

#Population File Management
Population_2010 <- read.csv("./Datasets/POP_ZIP_AGG_OH_2010.csv", sep = ",")
Population_20112017 <- read.csv("./Datasets/PopZipCode2011-2017.csv", sep = ",")

pop.whitemales2064_2010 <- apply(Population_2010[,11:22], 1, sum)
pop.whitefemales2064_2010 <- apply(Population_2010[,35:46], 1, sum)
pop.blackmales2064_2010 <- apply(Population_2010[,59:70], 1, sum)
pop.blackfemales2064_2010 <- apply(Population_2010[,83:94], 1, sum)

pop.whitemales2064_20117 <- apply(Population_20112017[,12:17], 1, sum)
pop.whitefemales2064_20117 <- apply(Population_20112017[,27:32], 1, sum)
pop.blackmales2064_20117 <- apply(Population_20112017[,43:48], 1, sum)
pop.blackfemales2064_20117 <- apply(Population_20112017[,58:63], 1, sum)

adjusted.pop_2010 <- apply(cbind(
  pop.whitemales2064_2010,
  pop.whitefemales2064_2010
,
  pop.blackmales2064_2010,
  pop.blackfemales2064_2010
), 1, sum)

adjusted.pop.zipcode_2010 <- data.frame(cbind(Population_2010[,1], 2010, adjusted.pop_2010))
names(adjusted.pop.zipcode_2010) <- c("zipcode", "year", "pop")

adjusted.pop_20117 <- apply(cbind(
  pop.whitemales2064_20117,
  pop.whitefemales2064_20117
,
  pop.blackmales2064_20117,
  pop.blackfemales2064_20117
), 1, sum)

```

```

adjusted.pop.zipcode_20117 <- cbind(Population_20112017[,1], Population_20112017[67],
                                   adjusted.pop_20117
                                   )
names(adjusted.pop.zipcode_20117) <- c("zipcode", "year", "pop")

adjusted.pop.zipcode <- rbind(
  adjusted.pop.zipcode_2010,
  adjusted.pop.zipcode_20117
)

#Adjust by age Population
TempPop_2010 <- as.data.frame(subset(adjusted.pop.zipcode, year ==2010, c("zipcode", "pop")))
TempPop_2011 <- as.data.frame(subset(adjusted.pop.zipcode, year ==2011, c("pop")))
TempPop_2012 <- as.data.frame(subset(adjusted.pop.zipcode, year ==2012, c("pop")))
TempPop_2013 <- as.data.frame(subset(adjusted.pop.zipcode, year ==2013, c("pop")))
TempPop_2014 <- as.data.frame(subset(adjusted.pop.zipcode, year ==2014, c("pop"))[-1,])
TempPop_2015 <- as.data.frame(subset(adjusted.pop.zipcode, year ==2015, c("pop"))[-1,])
TempPop_2016 <- as.data.frame(subset(adjusted.pop.zipcode, year ==2016, c("pop"))[-1,])
TempPop_2017 <- as.data.frame(subset(adjusted.pop.zipcode, year ==2017, c("pop")))

TempPop <- cbind(TempPop_2010, TempPop_2011, TempPop_2012, TempPop_2013, TempPop_2014, TempPop_2
015, TempPop_2016, TempPop_2017)
names(TempPop) <- c("ZipCode", "A2010", "A2011", "A2012", "A2013", "A2014", "A2015", "A2016", "A
2017")

linearmodel <- function(x){
  df <- data.frame(Years = seq(0, 84, 12))
  df$Pop <- x[2:9]
  df$Pop[which(df$Pop==0)] <- 1
  model1 <- lm(log(Pop) ~ Years, data = df)
  predicted <- exp(predict(model1, newdata = data.frame(Years = c(0:95))))
  return(predicted)
}

splineModel <- function(x) {
  model1 <- smooth.spline(seq(0, 84, 12), x[2:9])
  return(predict(model1, 1:96)$y)
}

predictedPopDf <- data.frame(t(apply(TempPop, 1, splineModel)))
predictedPopDf$ZipCodes <- TempPop$ZipCode

TempOhioZipCodeYear <- OpioidDeathsZipCodeYear
TempOhioZipCodeYear2 <- matrix(0,1,98)

for(i in as.numeric(predictedPopDf$ZipCodes)){
  if(!substring(as.character(i),1,1) == "*") {
    if(!i %in% TempOhioZipCodeYear$ZipCode){
      temp <- cbind(matrix(0,1,97), i)
      TempOhioZipCodeYear2 <- rbind(TempOhioZipCodeYear2, temp)
    } else {
      temp <- matrix(as.numeric(TempOhioZipCodeYear[TempOhioZipCodeYear$ZipCodes==i, ]), 1, 98)
      TempOhioZipCodeYear2 <- rbind(TempOhioZipCodeYear2, temp)
    }
  }
}

```

```

    }
  }

TempOhioZipCodeYear2 <- as.data.frame(TempOhioZipCodeYear2)
TempOhioZipCodeYear2 <- TempOhioZipCodeYear2[-1,]

names(TempOhioZipCodeYear2) <- names(OpioidDeathsZipCodeYear)
rownames(TempOhioZipCodeYear2) <- TempOhioZipCodeYear2$ZipCodes

POpDeaths <- merge(OpioidDeathsZipCodeYear[, -97], predictedPopDf, by = "ZipCodes")

aggOpioidsDeath <- data.frame(ZipCodes=POpDeaths$ZipCodes)
aggOpioidsPop <- data.frame(ZipCodes=POpDeaths$ZipCodes)

aggOpioidsDeath_ind <- data.frame(ZipCodes=POpDeaths$ZipCodes)
aggOpioidsPop_ind <- data.frame(ZipCodes=POpDeaths$ZipCodes)

aggOpioidsDeath_ind <- data.frame(ZipCodes=POpDeaths$ZipCodes)
aggOpioidsPop_ind <- data.frame(ZipCodes=POpDeaths$ZipCodes)

### AGGREGATION PERIOD FOR TEMPORAL ANALYSIS 2 #####
aggregation_period <- 1
###-----#####

periodSize <- 96 / aggregation_period

for (subframe in seq(2, 98-aggregation_period, aggregation_period)) {
  ifelse(
    aggregation_period == 1,
    aggOOD <- POpDeaths[subframe],
    aggOOD <- apply(POpDeaths[, seq(subframe, subframe+aggregation_period-1)], 1, sum)
  )
  ifelse(
    aggregation_period == 1,
    avgPop <- POpDeaths[subframe+96],
    avgPop <- apply(POpDeaths[seq(subframe+96, subframe+96+aggregation_period-1)], 1, mean)
  )
  aggOpioidsDeath_ind[, colnames(POpDeaths)[subframe]] <- aggOOD
  aggOpioidsPop_ind[, colnames(POpDeaths)[subframe]] <- avgPop
}

CasesAdjusted_ind <- apply(aggOpioidsDeath_ind[, -1], 2, sum)
PopAdjusted_ind <- apply(aggOpioidsPop_ind[, -1], 2, sum)
ratesAdjusted_ind <- apply(aggOpioidsDeath_ind[, -1], 2, sum)/apply(aggOpioidsPop_ind[, -1], 2, sum)*100000
timeseries_Real_T_ind <- ts(ratesAdjusted_ind, start = 1, end = length(CasesAdjusted_ind))

pvaluesig_ind <- c()
pvaluesig2_ind <- c()
pvaluecum_ind <- 1
pos_test_ind <- 0
modelbest_ind <- c()
modelbest_ind_report <- c()

```

```

period_ind <- 12
vector_cases <- as.data.frame(timeseries_Real_T_ind)
vector_cases$population <- PopAdjusted_ind

for (i in period_ind:(length(ratesAdjusted_ind)-period_ind)) {
  pre.period <- c(i-period_ind, i)
  post.period <- c(i+1, i+period_ind-1)
  impact <- CausalImpact(log(vector_cases), pre.period, post.period)
  pvalue <- impact$summary$p[1]
  pvaluesig_ind[length(pvaluesig_ind)+1] <- i
  pvaluesig2_ind[length(pvaluesig2_ind)+1] <- pvalue
  modelbest_ind[length(modelbest_ind)+1] <- impact
  modelbest_ind_report[length(modelbest_ind_report)+1] <- impact$report
}

trim_temp <- c()
for (i in 1:(96/3)) {
  for (j in 1:(12/4)){
    trim_temp[length(trim_temp)+1] <- i
  }
}

sem_temp <- c()
for (i in 1:(96/6)) {
  for (j in 1:(12/2)){
    sem_temp[length(sem_temp)+1] <- i
  }
}

year_temp <- c()
for (i in 1:(96/12)) {
  for (j in 1:(12/1)){
    year_temp[length(year_temp)+1] <- i
  }
}

temporaltrend <- data.frame(monthpvalue = pvaluesig2_ind)
agg_period <- trim_temp
temporaltrend$agg <- agg_period[seq(period_ind,length(ratesAdjusted_ind)-period_ind,1)]
plot_effect <- aggregate(monthpvalue ~ agg, temporaltrend, mean)

### AGGREGATION PERIOD #####
aggregation_period <- 3
###-----###

periodSize <- 96 / aggregation_period

for (subframe in seq(2, 98-aggregation_period, aggregation_period)) {
  ifelse(
    aggregation_period == 1,
    aggOOD <- POPDeaths[subframe],
    aggOOD <- apply(POPDeaths[,seq(subframe,subframe+aggregation_period-1)], 1, sum)
  )
  ifelse(

```



```

aggregation_period == 1,
avgPop <- POpDeaths[subframe+96],
avgPop <- apply(POpDeaths[seq(subframe+96, subframe+96+aggregation_period-1)], 1, mean)

)
aggOpioidsDeath[,colnames(POpDeaths)[subframe]] <- aggOOD
aggOpioidsPop[,colnames(POpDeaths)[subframe]] <- avgPop
}

MapCasesTime <- aggOpioidsDeath
MapPopTime <- aggOpioidsPop

CasesAdjusted <- apply(aggOpioidsDeath[,-1], 2, sum)
PopAdjusted <- apply(aggOpioidsPop[,-1], 2, sum)
ratesAdjusted <- apply(aggOpioidsDeath[,-1], 2, sum)/apply(aggOpioidsPop[,-1], 2, sum)*100000

timeseries_Real_T <- ts(CasesAdjusted, start = 1, end = length(CasesAdjusted))
startint <- round(length(CasesAdjusted)*0.3)
endint <- round(length(CasesAdjusted)*0.8)

pvaluesig <- c()
pvaluesig2 <- c()
pvaluecum <- 1
pos_test <- 0

for (i in startint:endint) {
  curvetoTest <- timeseries_Real_T ### Cases Included
  timeseries_Real_T2 <- curvetoTest
  balance <- i
  dummy_TS <- c(rep(0,balance), rep(1,periodSize-balance))
  test_interrupted <- as.data.frame(cbind(timeseries_Real_T2 + 0.0001, dummy_TS, log(PopAdjusted)))
  names(test_interrupted) <- c("OODeaths", "Test", "LogPopulation")
  test_interrupted$time <- 1:periodSize
  model2 <- glm(data = test_interrupted, OODeaths ~ Test*time + time + LogPopulation, family = poisson)
  pvalue <-summary(model2)$coefficients[,4][2]
  pvaluesig[length(pvaluesig)+1] <- i
  pvaluesig2[length(pvaluesig2)+1] <- pvalue
  if(pvalue<pvaluecum){
    modelbest <- model2
    pos_test <- balance
    pvaluecum <- pvalue
    summaryTest <- summary(model2)
  }
}

par(mfrow=c(1,1))
plot (
  curvetoTest / PopAdjusted * 10^5,
  type = 'p',
  xaxt = "n",
  yaxt = "n",
  xlab = "",

```

```

ylab = "",
cex.lab = 2,
ylim = c(-3, max(curvetoTest / PopAdjusted * 10^5))
)

plot_effects_sig <- plot_effect[plot_effect$monthpvalue<0.005,]
temp <- rbind(plot_effects_sig[1,],
              plot_effects_sig[c(FALSE,!diff(plot_effects_sig$agg)==1),]
)

for (sig_time in temp$agg){
  print(sig_time)
  rect(sig_time-1, -10, sig_time+1, max(curvetoTest)+10, col = "#55555522",border = "transparent")
}

k <- 0
lastk <- 0
for (element in agg_period[seq(period_ind,length(ratesAdjusted_ind)-period_ind,1)]){
  if(element %in% temp$agg){
    if(!k-lastk == 1){
      tempTrend <- data.frame(effect = modelbest_ind[[k]]$cum.effect)
      tempTrend$agg <- agg_period
      plot_cum_effect <- aggregate(effect ~ agg, tempTrend, sum, na.action=NULL)
      lines(
        plot_cum_effect$agg,
        plot_cum_effect$effect,
        type = "o",
        col="black",
        pch=18,
        lwd=2,
        lty=1,
        cex=1
      )
      print(modelbest_ind_report[k])
    }
    lastk <- k
  }
  k <- k+1
}

datanew <- data.frame(LogPopulation=log(PopAdjusted), time = 1:periodSize, Test=0)
datanew_2 <- data.frame(LogPopulation=log(PopAdjusted), time = 1:periodSize, Test=1)

pred1 <- predict(modelbest, type="response", newdata = datanew) / PopAdjusted * 10^5
pred2 <- predict(modelbest, type="response", newdata = datanew_2) / PopAdjusted * 10^5
pred1 <- ifelse(pred1>0, pred1, 0.00001)
pred2 <- ifelse(pred2>0, pred2, 0.00001)

lines(
  1:periodSize,
  pred1[1:periodSize],
  type = "o",
  col="#0C92C2FF",

```

```
pch=18,
lwd=3,
lty=1,
cex=1
)

y <- plot_effect[,2]
n <- length(y)
x <- plot_effect[,1]
s = smooth.spline(x, y, spar=0.1)
xy <- predict(s, seq(min(x), max(x), by=1))
m <- length(xy$x)
x.poly <- c(xy$x, xy$x[m], xy$x[1])
y.poly <- c(xy$y+0.01, 0, 0)
polygon(
  x.poly,
  y.poly * max(curvetoTest / PopAdjusted * 10^5),
  col="#0C92C222",
  border=NA
)

axis(1, at=seq(1,periodSize), labels=as.character(colnames(POpDeaths)[seq(2, 98-aggregation_peri
od, aggregation_period)]), las=2, cex.axis=1)
axis(2, cex.axis=1)
stepsize <- seq(0, max(curvetoTest / PopAdjusted * 10^5), 5)
axis(4, at=stepsize, labels=round(seq(0, max(stepsize)/max(curvetoTest / PopAdjusted * 10^5), le
ngth.out=length(stepsize)), 2), cex.axis=1)

legend("topleft",
  legend=c("Rates Prescription opioid overdose deaths",
    "Trendline (Poisson)",
    "Turning points estimated effect",
    "p-values simulated turning points (right axis)",
    "Significant turning points periods (p-value < 0.005)"
  ),
  col=c("black", "#0C92C2FF", "black", "#0C92C222", "#55555522"),
  lty=c(NA, 2, 2, NA, NA),
  lwd=c(NA, 2, 1, NA, NA),
  cex=1,
  pch=c(1, 18, 18, 17, 15),
  bty = "n",
  pt.cex = c(1,1,1,2,2)
)
```

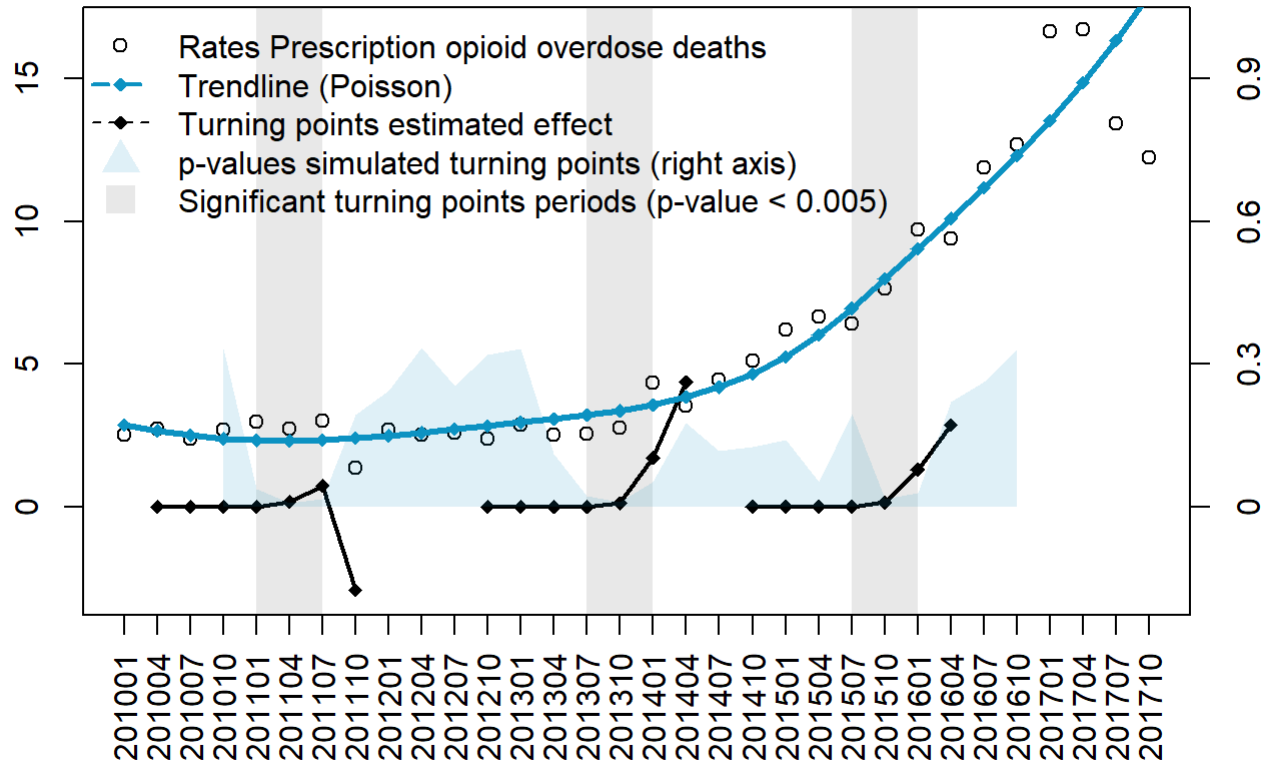

Supplement: 41598_2020_61281_MOESM2_ESM.pdf [file 41598_2020_61281_MOESM2_ESM.pdf]
